# Supplementary material for: Magnetic-field induced formation of 1D Fe3O4/C/CdS coaxial nanochains as highly efficient and reusable photocatalysts for water treatment
Source: Royal Society of Chemistry journal article supplement (doi:10.1039/c1jm13789a), 2011-01-01
Supplement: c1jm13789a.pdf [file c1jm13789a.pdf]

## Electronic supplementary information

---

### **Magnetic-field induced formation of 1D Fe<sub>3</sub>O<sub>4</sub>/C/CdS coaxial nanochains as highly efficient and reusable photocatalysts for water treatment**

*Yu Liu,<sup>a</sup> Liang Zhou,<sup>b</sup> Yong Hu,<sup>\*a</sup> Changfa Guo,<sup>a</sup> Haisheng Qian,<sup>a</sup> Fumin Zhang<sup>a</sup> and Xiong Wen (David) Lou<sup>\*b</sup>*

<sup>a</sup> Institute of Physical Chemistry, Zhejiang Normal University, Jinhua, 321004, P. R. China E-mail: [yonghu@zjnu.edu.cn](mailto:yonghu@zjnu.edu.cn)

<sup>b</sup> School of Chemical and Biomedical Engineering, Nanyang Technological University, 70 Nanyang Drive, Singapore, 639798, Singapore E-mail: [xwlou@ntu.edu.sg](mailto:xwlou@ntu.edu.sg)

According to the Lambert-Beer Law,  $A = \varepsilon cd$ , where  $A$  is the absorbance,  $\varepsilon$  is the molar absorption coefficient,  $c$  is the concentration of the absorbing species, and  $d$  is the length of the light path through the sample. The absorbance of RhB is linear to samples' concentration; hence the ratio of absorbance of RhB can be used to calculate the ratio of  $C/C_0$ . Here,  $C_0$  is the concentration of the RhB after adsorption equilibrium by stirring for 2 h in the dark and before irradiation. The absorption spectra of the RhB solutions at different exposure times in the presence of different samples (a-e) are shown in Figure S1 below.

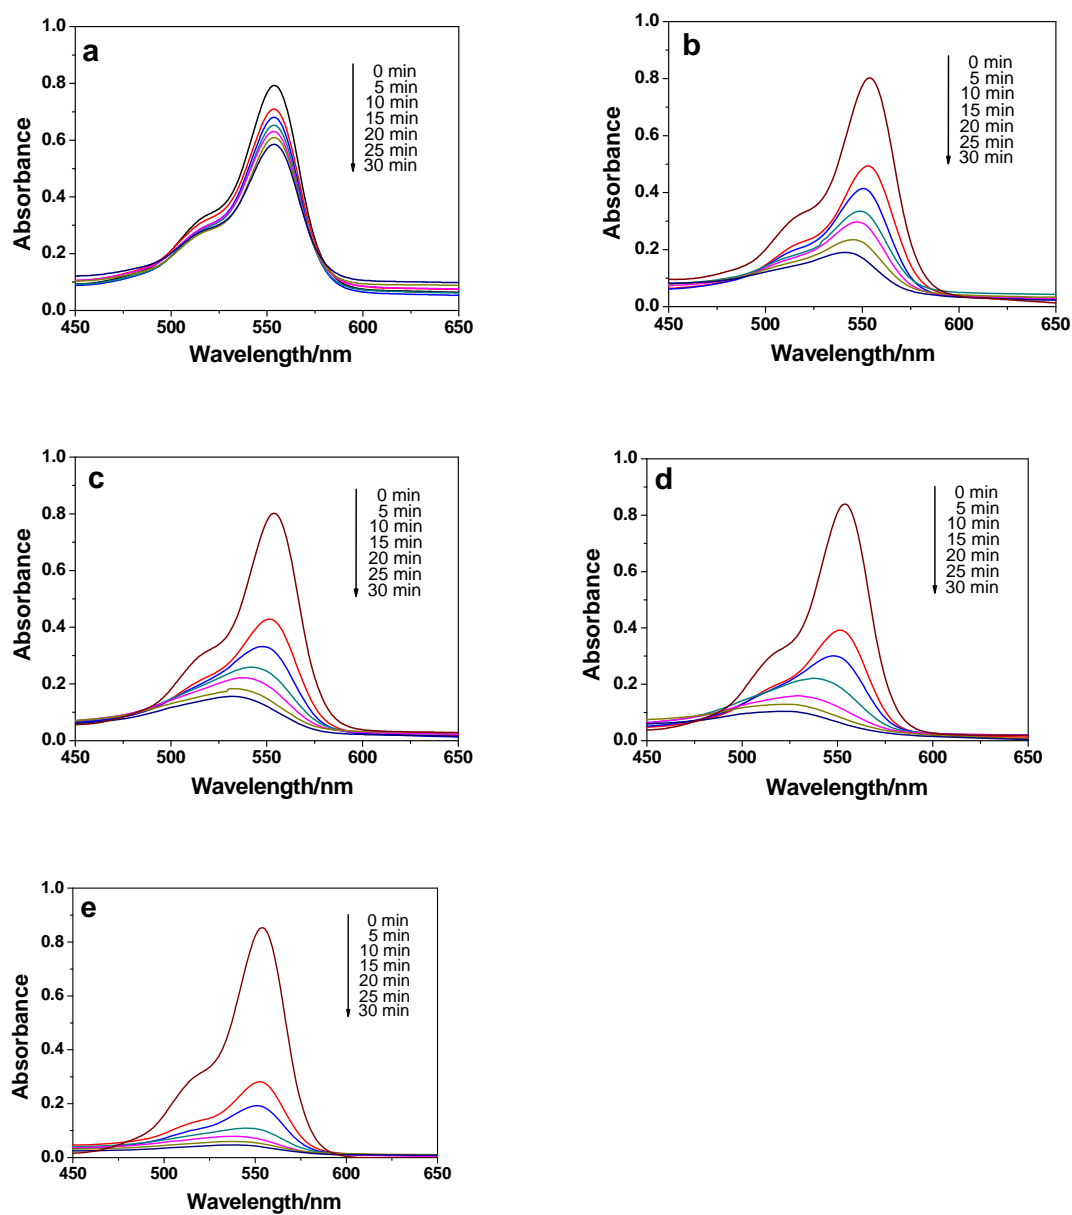

**Figure S1.** The absorption spectra of the RhB solutions at different exposure times in the presence of different samples a) S0, b) S5, c) S10, d) S15 and e) S20.
